# Supplementary material
Source: publisher site journal article supplement (https://www.dovepress.com/article/279020)
Supplement: Supplementary file 1 [file get_supplementary_file.php]

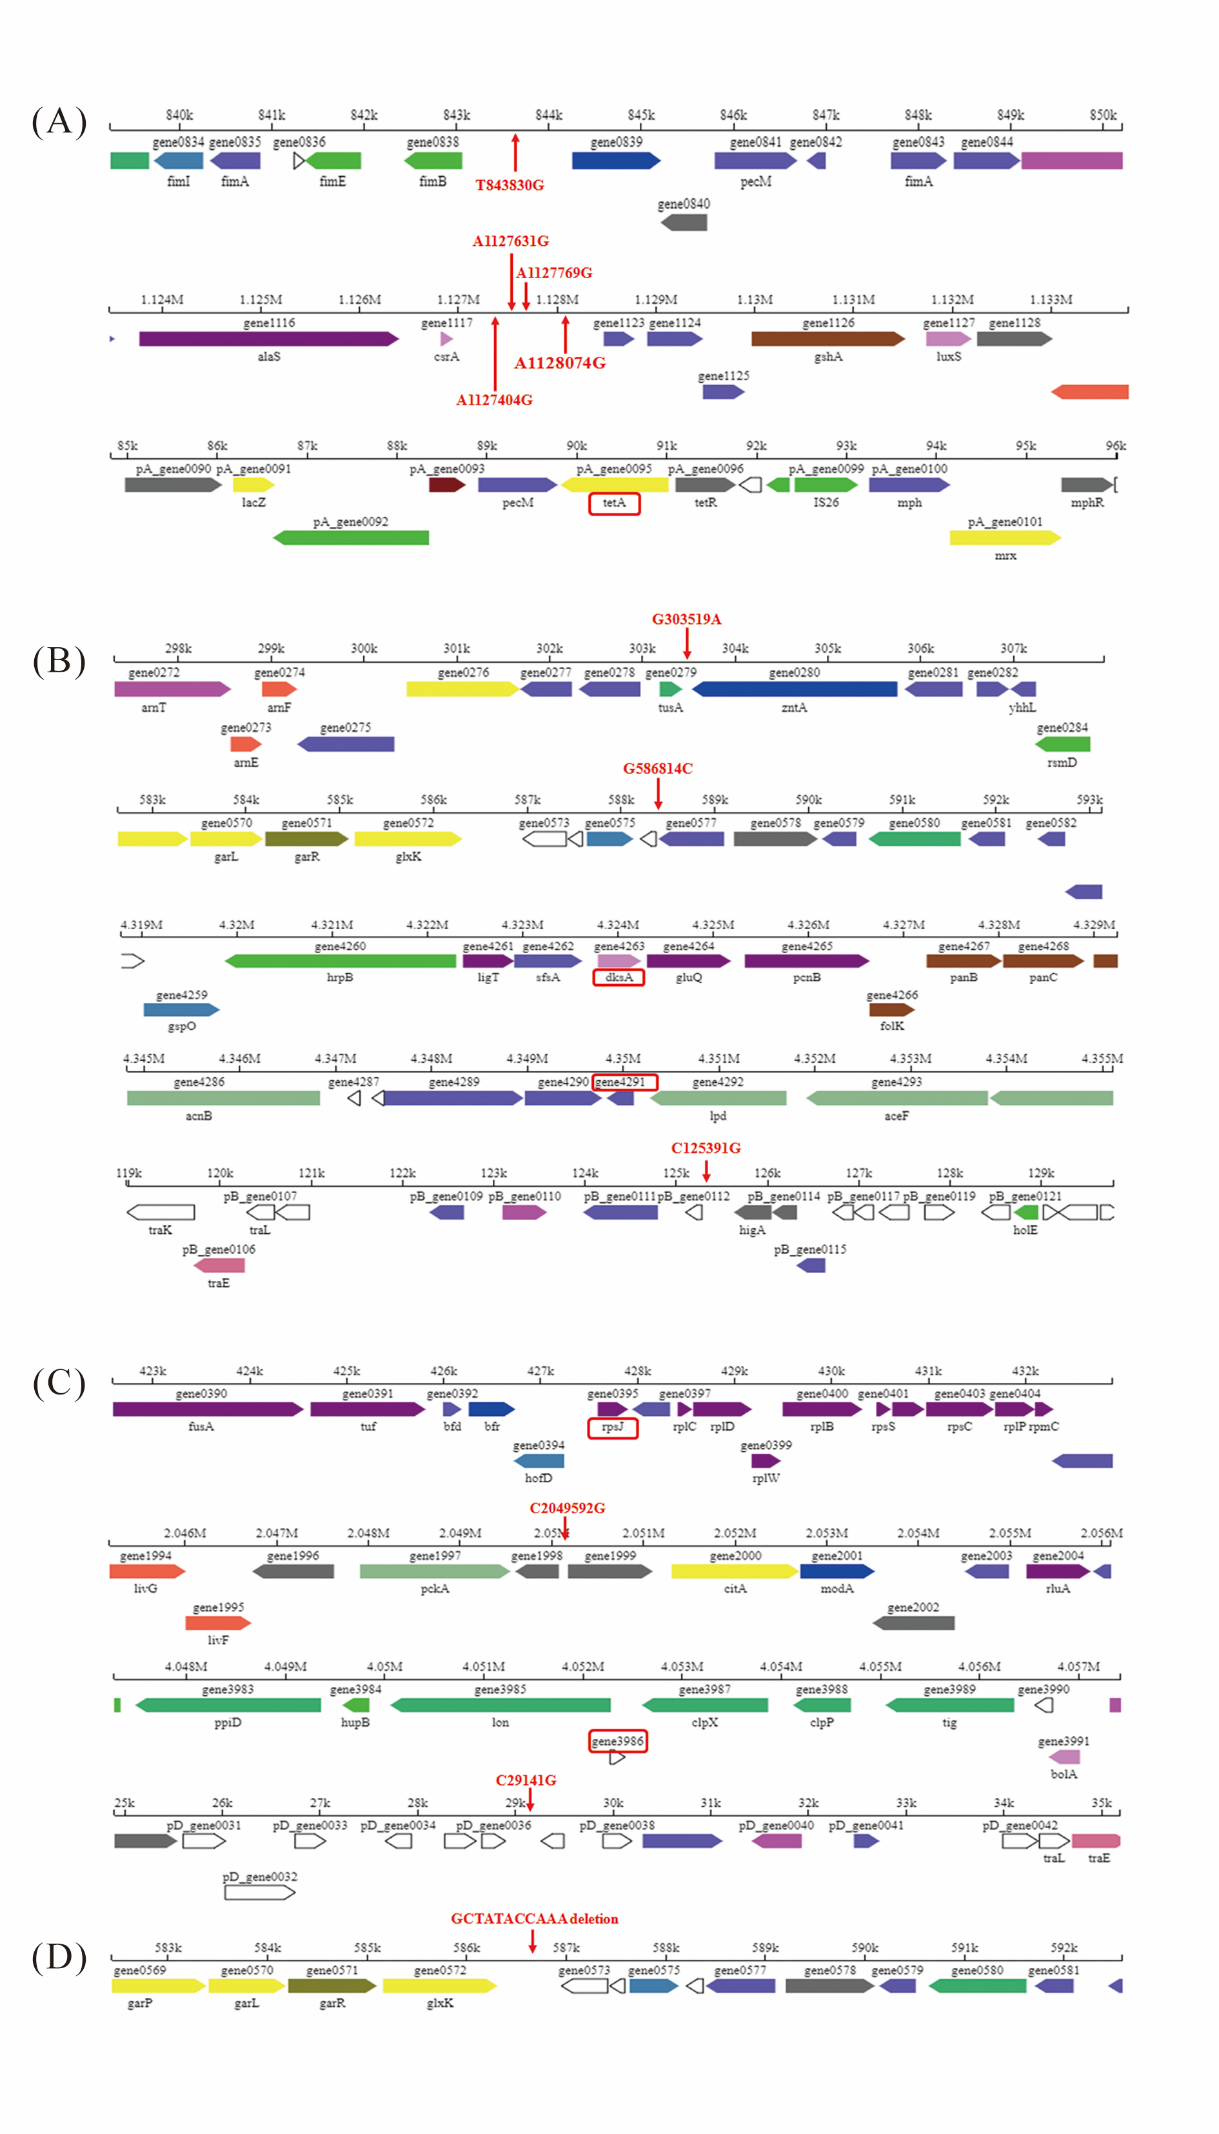


**Figure S1** Genetic environment of the mutations in K2606 after exposure to tigecycline. (A) SNP occurred in both K2606-4 and K2606-16. (B) SNP only occurred in K2606-4. (C) SNP only occurred in K2606-16. (D) INDEL occurred in K2606-4.
